# Supplementary material for: Types and Distribution of Bioactive Polyunsaturated Aldehydes in a Gradient from Mesotrophic to Oligotrophic Waters in the Alborán Sea (Western Mediterranean)
Source: PubMed Central journal article supplement (PMC7143741; doi:10.3390/md18030159), 2020-03-12
Supplement: marinedrugs-18-00159-s001.pdf [file marinedrugs-18-00159-s001.pdf]

Supplementary Figures

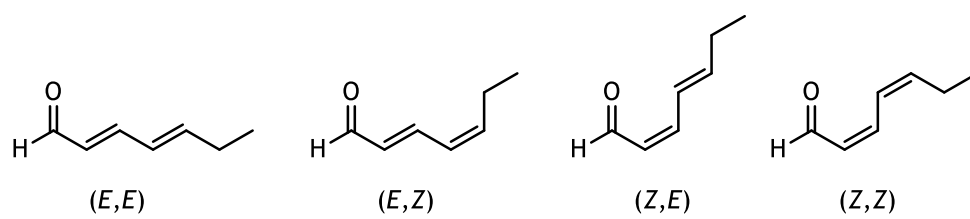

**Figure S1:** Molecular structure of isomers Type I using heptadienal as an example.

## Supplementary tables

**Table S1:** Phytoplankton functional groups used for FLOW CAM quantification of large size phytoplankton (10-250  $\mu\text{m}$ ) cell abundance and biovolume. Grouping name for analysis is detailed.

| Category                 | Size range<br>09 to 20 $\mu\text{m}$ | Size range<br>20 to 100 $\mu\text{m}$ | Size range<br>100 to 250 $\mu\text{m}$ |
|--------------------------|--------------------------------------|---------------------------------------|----------------------------------------|
| <b>Others</b>            | Spherical cells                      | Spherical cells                       |                                        |
|                          | Elliptical cells                     | Elliptical cells                      | Elliptical cells                       |
|                          | Discoid cells                        | Discoid cells                         |                                        |
|                          | Cylindrical cells                    |                                       |                                        |
|                          | Filamentous chains                   | Filamentous chains                    | Filamentous chains                     |
| <b>Coccolithophorids</b> |                                      | Coccolithophores                      |                                        |
| <b>Silicoflagellates</b> | Silicoflagellates                    | Silicoflagellates                     | Silicoflagellates                      |
| <b>Dinoflagellates</b>   |                                      | <i>Protooperidinium</i>               | <i>Protooperidinium</i>                |
|                          |                                      | <i>Ceratium</i>                       | <i>Ceratium</i>                        |
|                          |                                      | <i>Prorocentrum</i>                   | <i>Prorocentrum</i>                    |
|                          |                                      | <i>Gymnodiniales</i>                  | <i>Gymnodiniales</i>                   |
|                          |                                      | <i>Peridinales</i>                    |                                        |
|                          |                                      | Unidentified dinoflagellates          | Unidentified dinoflagellates           |
|                          |                                      |                                       |                                        |
| <b>Tintinids</b>         |                                      | Extended-lorica tintinnids            | Extended-lorica tintinnids             |
|                          |                                      | Globular-lorica tintinnids            | Globular-lorica tintinnids             |
| <b>Diatoms</b>           |                                      | Pennate diatoms                       | Pennate diatoms                        |
|                          |                                      | Needle-like diatoms                   | Needle-like diatoms                    |
|                          |                                      | <i>Rhizosolenia &amp; Proboscia</i>   | Proboscia                              |
|                          |                                      | Wide-chain diatoms                    | Pleurosigma                            |
|                          |                                      | <i>Guinardia striata</i>              |                                        |
|                          |                                      | <i>Blavyanus flaccida</i>             |                                        |
|                          |                                      | <i>Leptocylindrus</i>                 |                                        |
|                          |                                      | Filamentous diatoms                   |                                        |
|                          |                                      | Slightly-connected diatoms            |                                        |
|                          |                                      | <i>Chaetoceros</i>                    | <i>Chaetoceros</i>                     |
|                          |                                      | <i>Skeletonema</i>                    | <i>Skeletonema</i>                     |
|                          |                                      | Unidentified single centric diatoms   | Unidentified single centric diatoms    |
|                          |                                      | Unidentified short-chain diatoms      |                                        |
|                          |                                      | Unidentified long-chain diatoms       |                                        |
|                          | <i>Thalassiosira</i>                 |                                       |                                        |
|                          | <i>Asterionellopsis</i>              | <i>Asterionellopsis</i>               |                                        |
|                          | <i>Thalassionema</i>                 | <i>Thalassionema</i>                  |                                        |
| <b>Phaeocystis</b>       |                                      | <i>Phaeocystis</i>                    |                                        |

**Table S2:** Spearman rank correlation coefficients performed on particulate (pPUA) and dissolved PUA (dPUA) data and environmental variables. d: dissolved; p: particulate; C7: 2E,4E/Z-heptadienal. C8: 2E,4E/Z-octadienal; C10: 2E,4E/Z-decadienal; T: Temperature (°C); S: Salinity; PAR: Photosynthetic Active Radiation (mmolquanta m<sup>-2</sup> s<sup>-1</sup>); F: Fluorescence (f.u.); ε: coefficient of dissipation of turbulent kinetic energy (m<sup>2</sup> s<sup>-3</sup>); Nitrate, phosphate and Silicate: μM. O<sub>2</sub>: mg L<sup>-1</sup>.  
\* significant at level 0.05; \*\* significant at level 0.01.

| Station depth | PUA      | T             | S             | PAR           | F            | NO <sub>3</sub> <sup>-</sup> | PO <sub>4</sub> <sup>3-</sup> | SiO <sub>4</sub> | ε              | Oxygen       |
|---------------|----------|---------------|---------------|---------------|--------------|------------------------------|-------------------------------|------------------|----------------|--------------|
| Jet<br>5 m    | dPUA     | 0.206         | -0.181        | 0.034         | 0.180        | -0.140                       | -0.058                        | -0.186           | <b>0.598**</b> | 0.198        |
|               | dC7      | 0.259         | -0.169        | 0.08          | 0.136        | -0.195                       | -0.028                        | -0.162           | 0.333          | 0.227        |
|               | dC8      | 0.182         | -0.204        | -0.022        | 0.200        | -0.137                       | -0.074                        | -0.206           | <b>0.660**</b> | 0.193        |
|               | dC10     | 0.169         | -0.119        | 0.072         | 0.133        | -0.094                       | -0.039                        | 0.068            | <b>0.522**</b> | 0.15         |
|               | pPUA     | <b>0.55</b>   | <b>0.67</b>   | -0.458        | <b>0.748</b> | -0.317                       | 0.189                         | -0.335           | 0.099          | -0.26        |
|               | pC7      | <b>0.77</b>   | <b>0.78</b>   | -0.411        | <b>0.755</b> | -0.267                       | -0.061                        | <b>-0.57</b>     | 0.13           | -0.25        |
|               | pC8      | 0.13          | 0.32          | <b>-0.505</b> | <b>0.631</b> | <b>-0.580</b>                | <b>0.577</b>                  | 0.131            | 0.03           | -0.28        |
|               | pC10     | 0.41          | <b>0.68</b>   | -0.260        | <b>0.575</b> | -0.164                       | 0.103                         | -0.371           | 0.059          | -0.08        |
| Coast<br>5 m  | dPUA     | -0.041        | 0.056         | 0.287         | -0.104       | 0.116                        | 0.251                         | -0.425           | -0.133         | -0.0023      |
|               | dC7      | 0.26          | -0.17         | 0.08          | 0.156        | -0.060                       | 0.218                         | -0.133           | -0.085         | 0.188        |
|               | dC8      | 0.182         | -0.204        | -0.022        | -0.128       | -0.103                       | 0.278                         | -0.041           | -0.126         | 0.05         |
|               | dC10     | -0.141        | 0.17          | -0.12         | 0.073        | 0.346                        | 0.083                         | 0.105            | -0.152         | -0.34        |
|               | pPUA     | <b>-0.955</b> | -0.219        | <b>0.662</b>  | -0.060       | 0.400                        | -0.322                        | <b>0.568</b>     | <b>-0.94</b>   | 0.318        |
|               | pC7      | <b>-0.917</b> | -0.173        | <b>0.519</b>  | -0.129       | <b>0.569</b>                 | -0.480                        | 0.463            | <b>-0.89</b>   | 0.177        |
|               | pC8      | <b>-0.917</b> | -0.226        | <b>0.854</b>  | 0.016        | 0.102                        | -0.061                        | <b>0.655</b>     | <b>-0.921</b>  | 0.484        |
|               | pC10     | <b>-0.751</b> | -0.486        | <b>0.821</b>  | 0.410        | -0.406                       | 0.476                         | <b>0.848</b>     | <b>-0.791</b>  | <b>0.827</b> |
| Gyre<br>5 m   | dPUA     | -0.148        | 0.125         | 0.0126        | -0.05        | 0.132                        | 0.044                         | 0.113            | 0.359          | -0.196       |
|               | dC7      | -0.17         | 0.128         | 0.03          | -0.04        | 0.141                        | 0.076                         | 0.101            | 0.454          | -0.184       |
|               | dC8      | -0.07         | 0.08          | 0.004         | -0.06        | 0.081                        | -0.028                        | 0.097            | 0.236          | -0.173       |
|               | dC10     | -0.278        | 0.217         | -0.01         | -0.05        | 0.223                        | 0.168                         | 0.160            | 0.283          | -0.239       |
|               | pPUA     | -0.012        | 0.01          | <b>0.902</b>  | 0.227        | -0.424                       | -0.455                        | -0.219           | -0.109         | -0.029       |
|               | pC7      | <b>-0.852</b> | <b>-0.796</b> | 0.287         | -0.266       | -0.497                       | <b>-0.730</b>                 | -0.158           | 0.75           | 0.816        |
|               | pC8      | -0.194        | -0.171        | <b>0.897</b>  | 0.089        | <b>-0.516</b>                | <b>-0.529</b>                 | -0.202           | 0.046          | 0.14         |
|               | pC10     | 0.234         | 0.245         | <b>0.892</b>  | 0.338        | -0.310                       | -0.290                        | -0.199           | -0.245         | -0.267       |
| Jet<br>DCM    | pPUA tot | <b>0.55</b>   | <b>0.67</b>   | -0.458        | <b>0.748</b> | -0.317                       | 0.189                         | -0.335           | 0.099          | -0.26        |
|               | pC7      | <b>0.77</b>   | <b>0.78</b>   | -0.411        | <b>0.755</b> | -0.144                       | -0.061                        | <b>-0.570</b>    | 0.13           | -0.25        |
|               | pC8      | 0.13          | 0.32          | <b>-0.505</b> | <b>0.631</b> | <b>-0.580</b>                | <b>0.577</b>                  | 0.131            | 0.03           | -0.28        |
|               | pC10     | 0.41          | <b>0.68</b>   | -0.26         | <b>0.575</b> | -0.164                       | 0.103                         | -0.371           | 0.059          | -0.08        |
|               | dPUA     | 0.206         | -0.181        | 0.034         | 0.18         | -0.140                       | -0.058                        | -0.186           | <b>0.598</b>   | 0.198        |
|               | dC7      | 0.259         | -0.169        | 0.08          | 0.136        | -0.195                       | -0.028                        | -0.162           | 0.333          | 0.227        |
|               | dC8      | 0.182         | -0.204        | -0.022        | 0.2          | -0.137                       | -0.074                        | -0.206           | <b>0.660</b>   | 0.193        |
|               | dC10     | 0.169         | -0.119        | 0.072         | 0.133        | -0.094                       | -0.039                        | -0.131           | <b>0.522</b>   | 0.150        |
| Coast<br>DCM  | pPUA     | <b>-0.955</b> | -0.219        | <b>0.662</b>  | -0.06        | 0.400                        | -0.322                        | <b>0.568</b>     | <b>-0.940</b>  | 0.318        |
|               | pC7      | <b>-0.917</b> | -0.173        | <b>0.519</b>  | -0.129       | <b>0.569</b>                 | -0.480                        | 0.463            | <b>-0.890</b>  | 0.177        |
|               | pC8      | <b>-0.917</b> | -0.226        | <b>0.854</b>  | 0.016        | 0.102                        | -0.061                        | <b>0.655</b>     | <b>-0.921</b>  | 0.484        |
|               | pC10     | <b>-0.751</b> | -0.486        | <b>0.821</b>  | 0.41         | -0.426                       | 0.476                         | <b>0.848</b>     | <b>-0.791</b>  | <b>0.827</b> |
|               | dPUA tot | -0.041        | 0.056         | 0.287         | -0.104       | 0.116                        | 0.251                         | -0.425           | -0.133         | -0.002       |
|               | HD       | 0.123         | -0.131        | 0.128         | 0.156        | -0.060                       | 0.218                         | -0.133           | -0.080         | 0.188        |
|               | OD       | 0.039         | -0.003        | <b>0.544</b>  | -0.128       | 0.069                        | 0.278                         | -0.041           | -0.120         | 0.050        |
|               | DD       | -0.36         | 0.362         | -0.103        | -0.339       | 0.346                        | 0.083                         | 0.105            | -0.152         | -0.340       |
| Gyre<br>DCM   | pPUA tot | -0.012        | 0.01          | <b>0.902</b>  | 0.227        | -0.424                       | -0.455                        | -0.219           | -0.109         | -0.029       |
|               | HD       | <b>-0.852</b> | <b>-0.796</b> | 0.287         | -0.266       | -0.497                       | <b>-0.730</b>                 | -0.158           | <b>0.750</b>   | <b>0.816</b> |
|               | OD       | -0.194        | -0.171        | <b>0.897</b>  | 0.089        | <b>-0.516</b>                | <b>-0.529</b>                 | -0.202           | 0.046          | 0.140        |
|               | DD       | 0.234         | 0.245         | <b>0.892</b>  | 0.338        | -0.310                       | -0.290                        | -0.199           | -0.245         | -0.267       |
|               | dPUA tot | -0.148        | 0.125         | 0.0126        | -0.05        | 0.132                        | 0.044                         | 0.113            | 0.359          | -0.196       |
|               | HD       | -0.17         | 0.128         | 0.03          | -0.04        | 0.141                        | 0.076                         | 0.101            | 0.454          | -0.184       |
|               | OD       | -0.07         | 0.08          | 0.004         | -0.06        | 0.081                        | -0.028                        | 0.097            | 0.236          | -0.173       |
|               | DD       | -0.278        | 0.217         | -0.01         | -0.05        | 0.223                        | 0.168                         | 0.160            | 0.283          | -0.239       |

**Table S3:** Spearman rank correlation coefficients performed on pPUA data and biological variables I (pigments) at the DCM of the different sites. High correlation are highlighted in grey. dPUA: dissolved PUA; pPUA: particulate PUA; dC7: 2E,4E/Z-heptadienal. dC8: 2E,4E/Z-octadienal; dC10: 2E,4E/Z-decadienal. Perid.: peridinin; Fx: Fucoxanthin; Viol.: violaxanthin; Prasin.; prasinoxanthin; Diadin.; diadinoxanthin; Allox.; alloxanthine; But-Fx:19'-butanoyloxyfucoxanthin. Hex-Fx: 19'-hexanoyloxyfucoxanthin. Significant values are highlighted in bold. "--" denotes undetected concentrations.

| Station | pPUA | Chl <i>a</i> | Chl <i>c</i> <sub>1</sub> | Chl <i>c</i> <sub>2</sub> | Chl <i>c</i> <sub>3</sub> | Perid. | But-Fx | Fx    | Violax | Prasinox | Hex-Fx | Diadin. | Allox | Diatox. | Luteine |
|---------|------|--------------|---------------------------|---------------------------|---------------------------|--------|--------|-------|--------|----------|--------|---------|-------|---------|---------|
| Jet     | pPUA | 0.91         | -0.11                     | 0.42                      | 0.079                     | -0.256 | 0.003  | 0.918 | 0.441  | 0.977    | 0.964  | 0.901   | 0.842 | -0.381  | 0.62    |
|         | pC7  | 0.946        | -0.60                     | 0.63                      | 0.031                     | -0.023 | -0.511 | 0.954 | 0.183  | 0.785    | 0.704  | 0.973   | 0.991 | -0.414  | 0.502   |
|         | pC8  | 0.31         | 0.709                     | -0.07                     | 0.217                     | -0.394 | 0.766  | 0.265 | 0.463  | 0.631    | 0.724  | 0.224   | 0.096 | 0.011   | 0.311   |
|         | pC10 | 0.51         | -0.29                     | -0.21                     | -0.64                     | -0.432 | -0.089 | 0.792 | 0.777  | 0.775    | 0.758  | 0.683   | 0.586 | -0.896  | 0.991   |
| Coast   | pPUA | 0.937        | 0.911                     | -0.982                    | 0.783                     | 0.03   | 0.587  | 0.851 | 0.65   | 0.533    | 0.984  | 0.803   | 0.99  | 0.908   |         |
|         | pC7  | 0.988        | 0.809                     | -0.999                    | 0.643                     | -0.171 | 0.413  | 0.728 | 0.485  | 0.352    | 0.929  | 0.668   | 0.986 | 0.806   |         |
|         | pC8  | 0.769        | 0.996                     | -0.865                    | 0.945                     | 0.361  | 0.823  | 0.977 | 0.866  | 0.784    | 0.986  | 0.956   | 0.929 | 0.995   |         |
|         | pC10 | 0.475        | 0.956                     | -0.616                    | 0.998                     | 0.683  | 0.975  | 0.986 | 0.99   | 0.959    | 0.854  | 0.996   | 0.725 | 0.958   |         |
| Gyre    | pPUA | -0.214       |                           | -                         |                           | -0.374 | -0.456 |       | -      |          | -0.227 | -0.351  | -     | -0.141  | -       |
|         | pC7  | 0.494        |                           | -                         |                           | -0.193 | 0.178  |       | -      |          | 0.188  | 0.481   | -     | 0.31    | -       |
|         | pC8  | -0.047       |                           | -                         |                           | -0.33  | -0.34  |       | -      |          | -0.107 | -0.191  | -     | -0.004  | -       |
|         | pC10 | -0.385       |                           | -                         |                           | -0.36  | -0.554 |       | -      |          | -0.314 | -0.527  | -     | -0.256  | -       |

**Table S4:** Spearman rank correlation coefficients performed on pPUA data and biological variables II (biovolume of taxonomical categories of large size phytoplankton) at the DCM of the different sites. High correlation is highlighted in grey. Significance level \*p< 0.05; \*\*p<0.01. dPUA: pPUA: particulate PUA; dC7: 2E,4E/Z-heptadienal. dC8: 2E,4E/Z-octadienal; dC10: 2E,4E/Z-decadienal. Significant values are highlighted with grey area.

|       |      | Diatoms | Coccolithophorids | Silicoflagellates | Dinoflagellates | Others |
|-------|------|---------|-------------------|-------------------|-----------------|--------|
| Jet   | pPUA | 0.730   | -0.425            | 0.881*            | 0.043           | 0.466  |
|       | pC7  | 0.831*  | -0.326            | 0.897*            | 0.057           | 0.524  |
|       | pC8  | 0.463   | -0.536            | 0.622             | 0.117           | 0.338  |
|       | pC10 | 0.568   | -0.292            | 0.945**           | -0.215          | 0.282  |
| Coast | pPUA | -0.086  | -0.157            | 0.244             | -0.041          | -0.116 |
|       | pC7  | -0.174  | -0.208            | 0.339             | -0.189          | -0.203 |
|       | pC8  | 0.021   | -0.106            | 0.026             | 0.171           | -0.009 |
|       | pC10 | 0.446   | 0.286             | -0.029            | 0.645*          | 0.423  |
| Gyre  | pPUA | -0.559  | -0.43             | 0.092             | -0.483          | -0.514 |
|       | pC7  | -0.193  | -0.429            | 0.106             | -0.687          | -0.544 |
|       | pC8  | -0.591  | -0.524            | 0.109             | -0.611          | -0.62  |
|       | pC10 | -0.542  | -0.33             | 0.068             | -0.318          | -0.392 |
| Total | pPUA | 0.338   | -0.079            | 0.569*            | -0.103          | 0.273  |
|       | pC7  | 0.503*  | 0.085             | 0.744*            | -0.073          | 0.414  |
|       | pC8  | 0.333   | -0.103            | 0.566*            | -0.058          | 0.327  |
|       | pC10 | 0.578*  | 0.0109            | 0.746*            | -0.065          | 0.509  |
